# Supplementary material
Source: HighWire-hosted journal article supplement (https://www.life-science-alliance.org/content/6/3/e202201583/F14)

**A.**

|            | Apoptotic MS1 cells(%) |        |           |         |      |
|------------|------------------------|--------|-----------|---------|------|
|            | 0ng/ml                 | 6ng/ml | 12.5ng/ml | 25ng/ml |      |
| Replicate1 |                        | 0.3    | 37.5      | 56.5    | 57.7 |
| Replicate2 |                        | 0.4    | 38        | 58      | 59   |
| Replicate3 |                        | 0.25   | 30        | 54      | 55   |

**D.**

|            | Apoptotic MS1 cells(%) |                     |
|------------|------------------------|---------------------|
|            | 0h(control MS1)        | 48h(cocultured MS1) |
| Replicate1 | 2.7                    | 19                  |
| Replicate2 | 4.6                    | 14.3                |
| Replicate3 | 2                      | 18                  |

**E.**

Replicate1  
Replicate2  
Replicate3

| 0ng/ml | Apoptotic Diff cells(%) |           |         |      |
|--------|-------------------------|-----------|---------|------|
|        | 6ng/ml                  | 12.5ng/ml | 25ng/ml |      |
|        | 0.5                     | 0.9       | 0.5     | 0.3  |
|        | 0.4                     | 0.8       | 0.9     | 0.85 |
|        | 1.1                     | 1.4       | 1.3     | 1.9  |

| Apoptotic MS1 cells(%) |                     |
|------------------------|---------------------|
| 0h(control MS1)        | 72h(cocultured MS1) |
| 0.1                    | 30                  |
| 1                      | 40                  |
| 2                      | 18                  |

Original blots

Figure 7F.

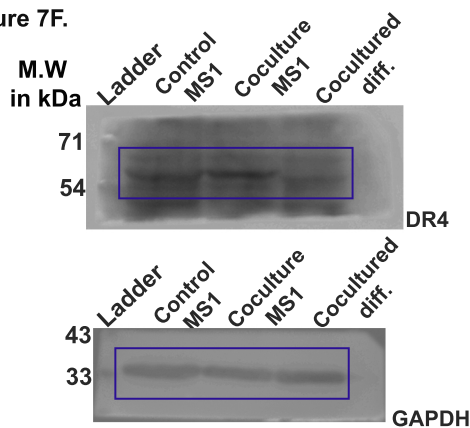

Cropped blots

Figure 7F.

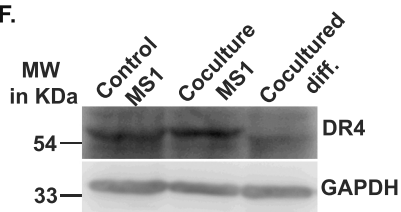

Figure 7H.

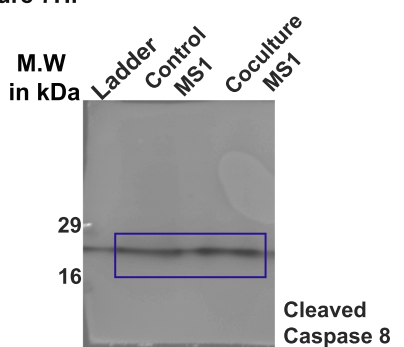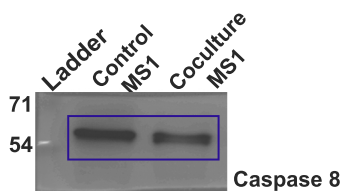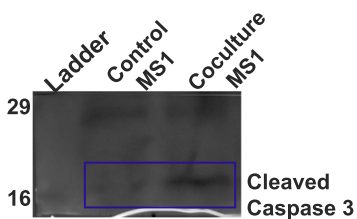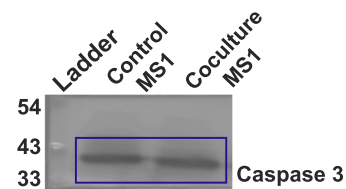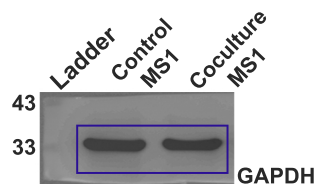

Figure 7H.

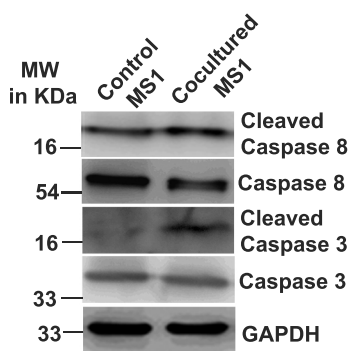

Original blots

Figure 7J.

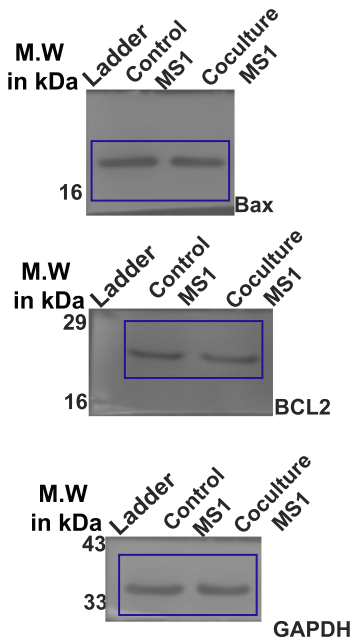

Cropped blots

Figure 7J.

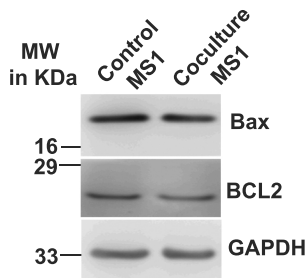

Supplement: inline-supplementary-material-13 [file inline-supplementary-material-13.pdf]
